# Supplementary material
Source: bioRxiv or medRxiv preprint supplement (https://www.biorxiv.org/highwire/filestream/96205/field_highwire_adjunct_files/0/313791-1.pdf)
Supplement: Supplementary file [file 313791-1.pdf]

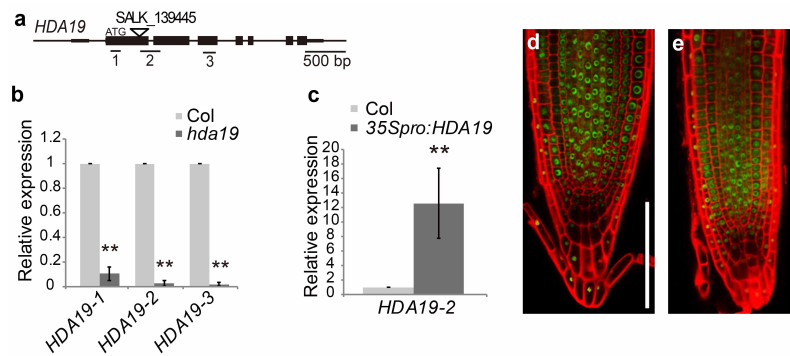

Fig S1. *HDA19* gene structure and expression.

(a) Schematic representation of the *HDA19* gene and the SALK\_139445 T-DNA insertion site.

(b - c) Relative expression level of *HDA19* in *hda19* mutant and in *HDA19* over-expressing line determined by qRT-PCR. The values over wild type (*Col*) are shown as means  $\pm$  SD, (\*\*P < 0.01; Student's *t* test).

(d - e) Confocal microscopy images of 8 day-old root tip of (e) *HDA19pro:HDA19-EGFP/hda19* and (f) *HDA19pro:HDA19-EGFP/hda19/scr* seedlings. Scale bar = 100  $\mu$ m.

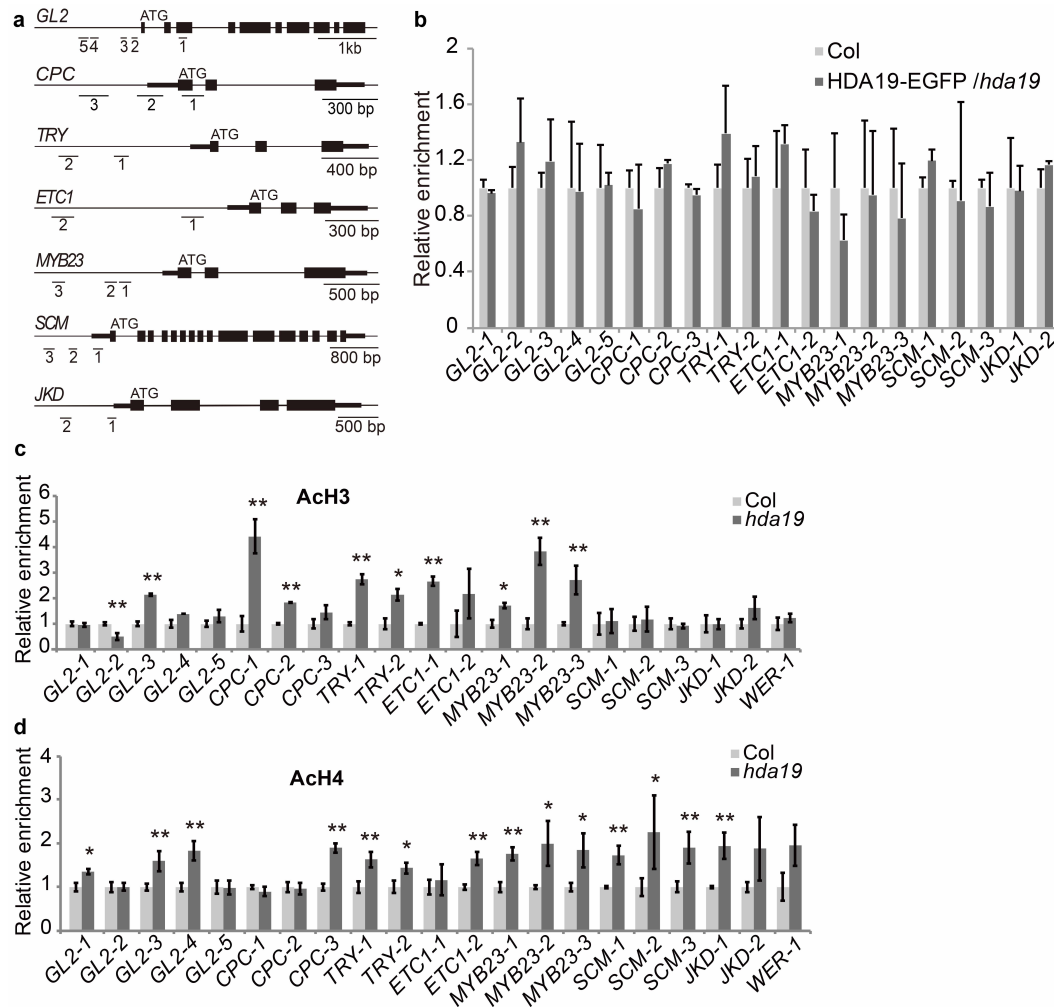

Fig S2. HDA19 affects histone acetylation levels of root epidermal patterning genes but does not directly bind to them.  
 (a) Schematic representation of root epidermal patterning genes. Regions selected for ChIP analysis are underlined.  
 (b) ChIP-qPCR analysis of HDA19 binding using GFP antibody in *HDA19pro:HDA19-EGFP/hda19*. Error bar represents SD value  
 (c - d) ChIP-qPCR analysis of acetyl-histone H3 (c) and acetyl-H4 (d) level changes in *hda19* root tips compared to wild type (Col). Error bar represents SD value (\*P < 0.05, \*\*P < 0.01; Student's *t* test).

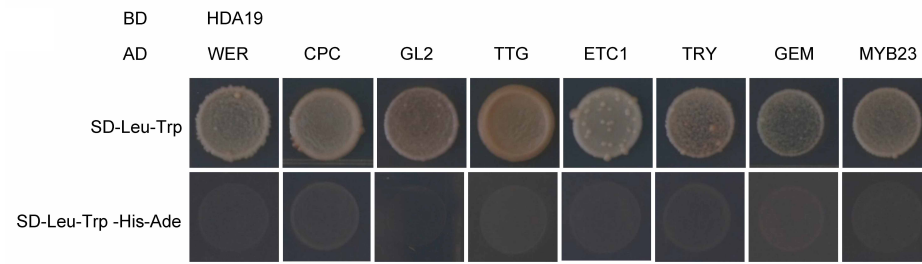

Fig S3. HDA19 does not interact with proteins of root epidermal patterning gene. Yeast-two-hybrid analysis did not detect any protein interaction between HDA19 and proteins of root epidermal patterning genes.

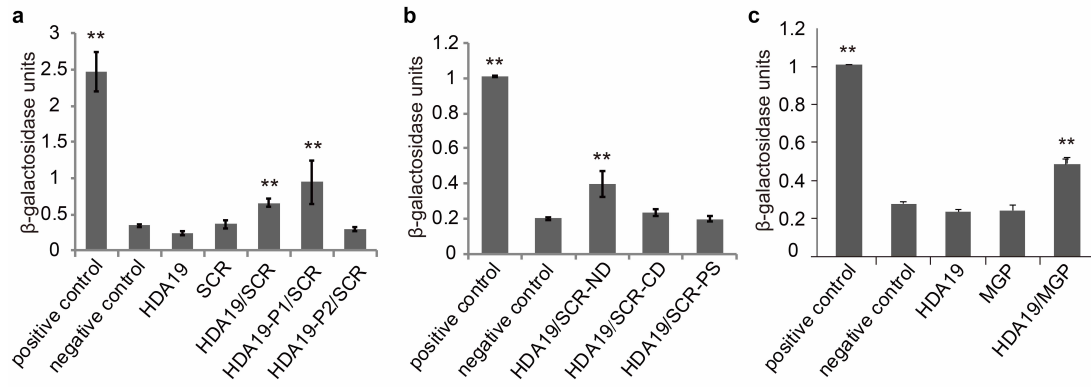

Fig S4. Quantification of the interaction between (a) HDA19 or fragments of HDA19 and SCR, (b) HDA19 and fragments of SCR described in Fig. 4b, and (c) HDA19 and MGP by  $\beta$ -galactosidase activity measurement. Error bar represents SD value (\*\* $P < 0.01$ ; Student's  $t$  test).

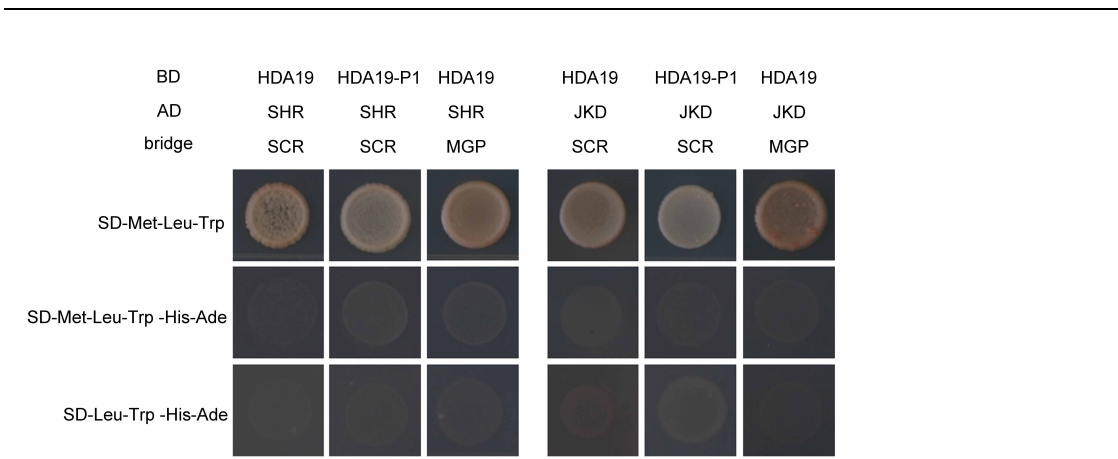

Fig S5. HDA19 does not interact with JKD or SHR indirectly. Yeast-three-hybrid analysis shows no indirect interaction between HDA19-JKD and HDA19-SHR via SCR or MGP as the bridge.

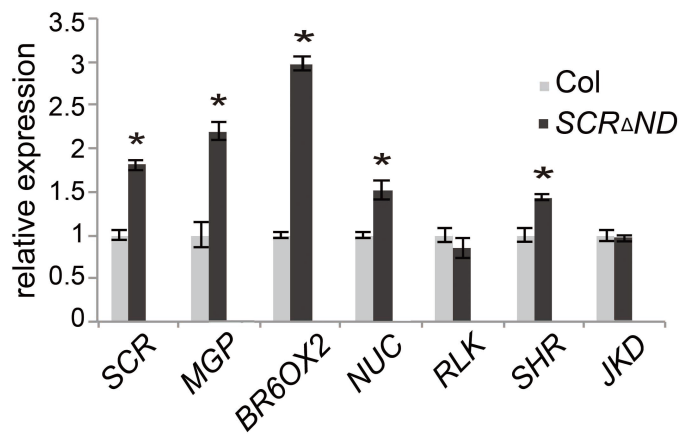

Fig S6. Expression of SCR target genes in *SCR ΔND* line. Expression determined by qRT-PCR in 8 day-old root tips. Error bar represents SD value (\* $P < 0.01$ ; Student's *t* test).

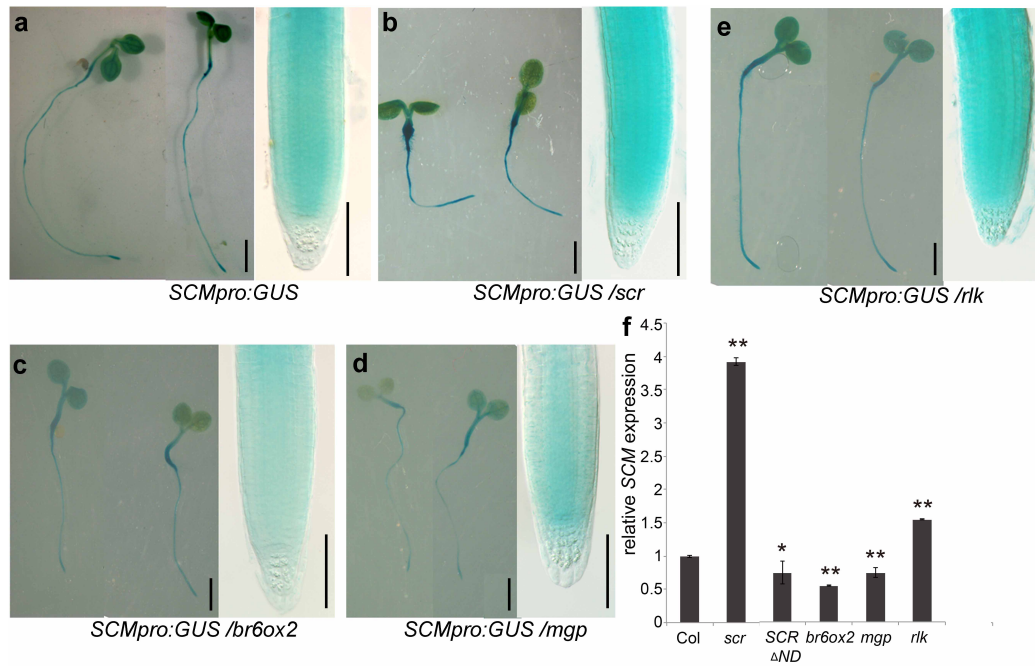

Fig S7. *SCM* expression in *scr* mutant alleles and mutants of SCR target genes. (a - e) *SCMpro:GUS* expression in 8 day-old seedling (left) and root tip (right). Scale bar left = 1mm, scale bar right = 100  $\mu$ m. (f) Expression level of *SCM* gene in 8 day-old root tips of *scr*, *SCR ΔND* and mutants of SCR target genes determined by qRT-PCR. Error bar represents SD value (\*\*P < 0.01; \*P < 0.05; Student's *t* test).

Table S1. Annotation of selected genes enriched in the root cortex.

| Gene ID   | Description                                                                                           | Go group                                                 |
|-----------|-------------------------------------------------------------------------------------------------------|----------------------------------------------------------|
| AT1G20010 | Beta tubulin                                                                                          | Membrane;<br>nucleotide-binding                          |
| AT1G20190 | Alpha-expansin gene family                                                                            | Membrane; signal                                         |
| AT1G62580 | Flavin monooxygenase that binds NO                                                                    | Membrane                                                 |
| AT1G65060 | COA Ligase 3                                                                                          | Nucleotide-binding                                       |
| AT1G70580 | Glyoxylate aminotransferase                                                                           |                                                          |
| AT1G75780 | beta tubulin gene                                                                                     | Nucleotide-binding                                       |
| AT1G76100 | One of two Arabidopsis plastocyanin genes                                                             | Membrane                                                 |
| AT2G02780 | Leucine-rich repeat protein kinase family protein                                                     | Membrane; signal;<br>nucleotide-binding;<br>glycoprotein |
| AT2G39010 | plasma membrane intrinsic protein 2E                                                                  | Membrane                                                 |
| AT2G44740 | cyclin p4;1 (CYCP4;1);                                                                                |                                                          |
| AT2G48020 | Major facilitator superfamily protein                                                                 | Membrane                                                 |
| AT3G28040 | Leucine-rich receptor-like protein kinase family protein                                              | Membrane; signal;<br>nucleotide-binding;<br>glycoprotein |
| AT3G51240 | flavanone 3-hydroxylase that is coordinately expressed with chalcone synthase and chalcone isomerases | Nucleotide-binding                                       |
| AT4G00710 | BR-signaling kinase 3 (BSK3)                                                                          | Membrane; signal                                         |
| AT4G04850 | Member of putative potassium transporter family                                                       | Membrane                                                 |
| AT5G07190 | unknown function                                                                                      | Membrane                                                 |
| AT5G07990 | Required for flavonoid 3' hydroxylase activity                                                        | Membrane                                                 |
| AT5G10470 | Kinesin that binds cyclin-dependent kinase CDKA                                                       | Membrane;<br>nucleotide-binding                          |
| AT5G27450 | Mevalonate Kinase                                                                                     | Nucleotide-binding                                       |
| AT5G62210 | Embryo-specific protein 3;<br>lipase/lipoxygenase                                                     | Membrane                                                 |
| AT5G64330 | Involved in blue light response signaling pathway; interacts with the blue light photoreceptor NPH1   | Membrane; signal                                         |
| AT5G64620 | Plant cell wall and vacuolar invertases                                                               | Signal                                                   |



Table S2. List of primers used in the experiments.

| Real-time PCR primers to test gene expression level |                            |
|-----------------------------------------------------|----------------------------|
| Gene                                                | Sequence                   |
| <i>GAPDH</i>                                        | CACCGAGGATGATGTTGTCT       |
|                                                     | CCCATTCGTTGTCGTACCA        |
| <i>WER</i>                                          | TTCGGTAGGATTCGGGAGATT      |
|                                                     | GGGTCGAACGGATAATCAAGTGA    |
| <i>CPC</i>                                          | CGACGACGGAGACAGAGCA        |
|                                                     | TCGCCAACGAGTTTATACATCC     |
| <i>GL2</i>                                          | CTGGTGCTCGCGGGACAT         |
|                                                     | CTTGGCTGTTTCTGTCGTCTTGT    |
| <i>TTG</i>                                          | ATTTGTTCTGGTGGTGATG        |
|                                                     | GCCGAATAAACCGACAT          |
| <i>GEM</i>                                          | CATCAGCGAGCATAGTCAATCC     |
|                                                     | GCGCCGTCGTAGTTTAAAAAA      |
| <i>TRY</i>                                          | TGTACAGACTTGTCGGTGATAGGTG  |
|                                                     | TTATCAGCAAAGCCTTCACTGTTTC  |
| <i>ETC1</i>                                         | CTTAAGACCAATCCAACCATTGTTG  |
|                                                     | CCTTTCACCGACAAGCTTATACATC  |
| <i>MYB23</i>                                        | GGGTATTGCCTTTGAATATCTTIG   |
|                                                     | GCTACAAGCAAATATTCGGAAAA    |
| <i>SCM</i>                                          | CAATCGCTTCACTGGGAACATTC    |
|                                                     | CCTGATAGAAGATTGCTTCCCAATG  |
| <i>JKD</i>                                          | GAGAGAATCATAATCGTGCTCCTC   |
|                                                     | GATCGGTTGATTGAAAGGG        |
| <i>MGP</i>                                          | GTTGGTGTACAAACAATATG       |
|                                                     | CAGCTTTGATAATTAAGTTC       |
| <i>SCR</i>                                          | ATTAGCGGTTGGAGG            |
|                                                     | ACTAAGAACGAGGCGT           |
| <i>BR6OX2</i>                                       | TCTCAAGATCATAGAGGAGATGG    |
|                                                     | TGGGTTACAAATTTACAAGATAAGAG |
| <i>RLK</i>                                          | ACGGCTACGTCAAATGGTC        |
|                                                     | CGGATTCCGATGTCTCAGAT       |
| <i>NUC</i>                                          | CCGCTTCAACCATTTGTACC       |
|                                                     | GAGAGCGACGAAGAAGTTGG       |
| Real-time PCR primers for ChIP assay                |                            |
| Fragment                                            | Sequence                   |
| <i>18S</i>                                          | TACCGTCCTAGTCTCAACCA       |
|                                                     | AACATCTAAGGGCATCACAG       |
| <i>pSCR-1</i>                                       | CGTCTTGTCCAATTCCTCTCAAG    |

|               |                             |
|---------------|-----------------------------|
|               | GCACAAAATTGCAAGTTGGTGC      |
| <i>pSCR-2</i> | AGTTGGTGCCCCATCTTAGTAAGC    |
|               | TCATTATGTGAAATGAATGGGTTTC   |
| <i>pSCR-3</i> | CGAAAGGTGGAAGACGACTTAG      |
|               | GTGAGAATTTGGAAGGATGTGG      |
| <i>pSCR-4</i> | TTCCGATCACCCACCTAATCTC      |
|               | GTGAAGCCTGGCCGTATCTAAG      |
| <i>pMGP-1</i> | TGAGACTTGAAGCCCAGAC         |
|               | TGAGTGCAAAGCGAGAAA          |
| <i>pMGP-2</i> | AACGGAAAAGGTAAGGTGGTTG      |
|               | ATGGCCTTCTTGTTTTACTCGG      |
| <i>pMGP-3</i> | ATATTCTTGTGCCGCCAAAGTTC     |
|               | TTGGAAGGAAGAGAAGTCGTCAG     |
| <i>pMGP-4</i> | ATGACAATAGCTGCGACAGTTC      |
|               | CCTACACACTTAAGCCCCATATG     |
| <i>pCYT-1</i> | CGAACTTTGTTATTTTCTTGGTACTGG |
|               | GCAATTTTCAGCACGAAATTCAG     |
| <i>pCYT-2</i> | AAATGCCTTCTCCTCTCATTAC      |
|               | GCAGCAGATTGCAAGATAACAATC    |
| <i>pCYT3</i>  | TGAGCGAAAATACTAACCAACC      |
|               | GGGTATCAGTAGCCCAAAAATC      |
| <i>pCYT-4</i> | CCATGTGCCCATCCTCATC         |
|               | GTTTATGATTCGACAGTGTAGTAGGG  |
| <i>pNUC-1</i> | TAAAGGGACCGATAAATAGT        |
|               | AATAAAGTTGTAAAAATGATAATA    |
| <i>pNUC-2</i> | CTCAGGGATTATTAGTAGTT        |
|               | TAAGGAGGTATCAAGGTGTG        |

|               |                           |
|---------------|---------------------------|
| <i>pNUC-3</i> | CTCGCTTCGAATTTGCAAGGCTAT  |
|               | GCACCCTATGTTTGCAGTTTCACT  |
| <i>pRLK-1</i> | AATCTTTATGCCCAACCAA       |
|               | TAGCAAATCACGTGTAAGAGAA    |
| <i>pRLK-2</i> | GCGTAATCTCACGTCACAATTTCCG |
|               | ACGTCGCTTTGTCGTTTTTCACG   |
| <i>pWER</i>   | ATCTCAGAAGTCCATTATTATTAC  |
|               | TCTTTTTGTTTCTTTGAATGATAGA |
| <i>pCPC</i>   | GAAACAAGAACACATATAAGGGAC  |
|               | AAGAAGAACGACAGATACAACC    |
| <i>pGL2</i>   | CGTCTTCTAAACTTTCTCTATCCG  |
|               | CCCAATCGAATCTAATACTGA     |
| <i>pETC1</i>  | GAATAAAGGGTATATCCTCGACG   |
|               | TATGAAGTCCAATCTATTAC      |
| <i>pTRY</i>   | AAACATCGTTGAACTTGCATCTGCC |
|               | GGCTAACTTTGTTCTCATTCGTAG  |
| <i>pMYB23</i> | CACCGTTTTCAACTAATAGTTGAGG |
|               | TGGAAGGGCTTGTTGACTCTC     |
| <i>pSCM-1</i> | GCCACATTTGGTTTGAATAGCC    |
|               | AACATGCTTGGTGAGCTTATGTG   |
| <i>pSCM-2</i> | AGAGCAAAAATGGACGTGGG      |
|               | GGGCAAGAAAACAGTTGAAG      |
| <i>pSCM-3</i> | TTTGTAAGCCGCTCGTTCTTC     |
|               | GGGTGAAACAGGGATATTCCTG    |
| <i>pSCM-4</i> | TTCAAGGGTTTTCTCATCTTCAGTG |
|               | CAGCTGAGAAAGGCATTGTCAAG   |
| <i>pJKD-1</i> | ATCCGTAAAAAGTGGAATCCG     |
|               | TGATGGGTTGAGTTGTAAATGG    |

---

|               |                           |
|---------------|---------------------------|
| <i>pJKD-2</i> | TCGTGCCTTGAAATTTTCTTCCTC  |
|               | TTTGGGTTTTAGGGCTTGAGAATG  |
| <i>pJKD-3</i> | CCTGATCATCTTCTTGTTTTCTTGC |
|               | GATCTCCTGGAATCATCTGCATATC |
| <i>pJKD-4</i> | GAAACACACCTTCATCATCTTCAGC |
|               | CCTGGAGTGCCAGGTTGATTTC    |

Table S3. Detailed data in FCS analysis.

| Filename            | Line                                        | Location               | Pixel Size<br>( $\mu\text{m}$ ) | % Monomer | % Dimer |
|---------------------|---------------------------------------------|------------------------|---------------------------------|-----------|---------|
| Root2-6-young endo  | HDA19pro:HDA19-EGFP x<br>SCRpro:SCR-mCherry | endodermis             | 0.1                             | 0.9402    | 0.0598  |
| Root2-5-young endo  | HDA19pro:HDA19-EGFP x<br>SCRpro:SCR-mCherry | endodermis             | 0.1                             | 0.9664    | 0.0336  |
| Root2-4-young endo  | HDA19pro:HDA19-EGFP x<br>SCRpro:SCR-mCherry | endodermis             | 0.1                             | 0.9864    | 0.0135  |
| Root2-3-young endo  | HDA19pro:HDA19-EGFP x<br>SCRpro:SCR-mCherry | endodermis             | 0.1                             | 0.9723    | 0.0277  |
| Root2-1-QC          | HDA19pro:HDA19-EGFP x<br>SCRpro:SCR-mCherry | QC                     | 0.1                             | 0.9834    | 0.0166  |
| Root 1-6 young endo | HDA19pro:HDA19-EGFP x<br>SCRpro:SCR-mCherry | endodermis             | 0.1                             | 0.9250    | 0.0749  |
| Root 1-5 young endo | HDA19pro:HDA19-EGFP x<br>SCRpro:SCR-mCherry | endodermis             | 0.1                             | 0.9797    | 0.0203  |
| Root 1-4 CEI/CEID   | HDA19pro:HDA19-EGFP x<br>SCRpro:SCR-mCherry | Stem cell              | 0.1                             | 0.9858    | 0.0142  |
| Root 1-3 QC         | HDA19pro:HDA19-EGFP x<br>SCRpro:SCR-mCherry | QC                     | 0.1                             | 0.9926    | 0.0073  |
| Root 1-2 CEI        | HDA19pro:HDA19-EGFP x<br>SCRpro:SCR-mCherry | Stem cell              | 0.1                             | 0.9930    | 0.0070  |
| Root1-1 CEI         | HDA19pro:HDA19-EGFP x<br>SCRpro:SCR-mCherry | Stem cell              | 0.1                             | 0.9892    | 0.0108  |
|                     |                                             |                        | average                         | 0.9740    | 0.0260  |
|                     |                                             |                        | average endodermis              | 0.9617    | 0.0383  |
|                     |                                             |                        | average QC/SC                   | 0.9888    | 0.0112  |
|                     |                                             |                        | stdev endodermis                | 0.0240    |         |
|                     |                                             |                        | stdev QC/SC                     | 0.0042    |         |
| Controls            |                                             |                        |                                 |           |         |
| <b>File name</b>    | <b>line</b>                                 | <b>monomeric value</b> |                                 |           |         |
| 35S:GFP-root4-4     | 35Spro:GFP                                  | 1.143                  |                                 |           |         |
| 35S:GFP-root3-5     | 35Spro:GFP                                  | 1.536                  |                                 |           |         |
| 35S:GFP-root3-2     | 35Spro:GFP                                  | 1.59                   | average                         | 1.42      |         |

---

|                           |                  |      |         |      |  |
|---------------------------|------------------|------|---------|------|--|
| UBQ10:mCherry<br>-root1-4 | UBQ10pro:mCherry | 1.3  |         |      |  |
| UBQ10:mCherry<br>-root1-3 | UBQ10pro:mCherry | 1.37 |         |      |  |
| UBQ10:mCherry<br>-root1-2 | UBQ10pro:mCherry | 1.27 | average | 1.31 |  |
